# Supplementary material
Source: MDPI journal article supplement (https://www.mdpi.com/2071-1050/16/5/1777)
Supplement: s1 [file s1]

**Table S1.** River segments sub-watershed characteristics.

| <b>Segment</b> | <b>Extension (m)</b> | <b>Dominant Geology</b>    | <b>Dominant Geomorphology</b>                                  | <b>Dominant Land Use</b> | <b>Basin area (km<sup>2</sup>)</b> | <b>Basin average slope (%)</b> | <b>Valley depth (m)</b> | <b>Channel sinuosity</b> | <b>Curvature/ Channel entrenchment</b> | <b>Channel gradient</b> |
|----------------|----------------------|----------------------------|----------------------------------------------------------------|--------------------------|------------------------------------|--------------------------------|-------------------------|--------------------------|----------------------------------------|-------------------------|
| <b>T1</b>      | 1600                 | Limestones                 | Limestone mountains and karstified platforms                   | Grassland                | 47.40                              | 40.50                          | 106.92                  | 1.29                     | -0.16                                  | 2.00                    |
| <b>T2</b>      | 3400                 | Limestones                 | Limestone mountains and karstified platforms                   | Forest and Grassland     | 51.60                              | 41.28                          | 68.27                   | 1.57                     | -0.13                                  | 0.80                    |
| <b>T3</b>      | 2000                 | Clays                      | Alluvial plain – colluvial                                     | Dry Crop and Grassland   | 54.23                              | 40.86                          | 50.51                   | 1.13                     | -0.05                                  | 0.50                    |
| <b>T4</b>      | 1800                 | Clays and marly limestones | Mountain ranges on conglomerates and granular rocks in general | Forest and grassland     | 107.36                             | 39.67                          | 50.87                   | 1.26                     | -0.04                                  | 1.10                    |
| <b>T5</b>      | 8400                 | Clays and marly limestones | Fault-block hills                                              | Dry crops                | 123.90                             | 37.95                          | 52.42                   | 2.31                     | -0.06                                  | 0.70                    |
| <b>T6</b>      | 6200                 | Marly limestones           | Alluvial plain - colluvial Marl and limestone mountains        | Forest and grassland     | 161.52                             | 37.88                          | 75.66                   | 1.79                     | -0.04                                  | 0.90                    |
| <b>T7</b>      | 3200                 | Marly limestones           | Marl and limestone mountains                                   | Forest and grassland     | 193.80                             | 37.72                          | 80.23                   | 1.09                     | -0.12                                  | 1.50                    |
| <b>T8</b>      | 2200                 | Clays and marls            | Alluvial plain - colluvial Hills and ridges of dissection      | Dry crops                | 220.38                             | 37.35                          | 47.33                   | 1.45                     | -0.04                                  | 0.30                    |
| <b>FS</b>      | 6600                 | Clays and marls            | Marl mountains. Clays                                          | Forest                   | 22.80                              | 44.02                          | 55.55                   | 1.66                     | -0.07                                  | 1.20                    |
| <b>AB</b>      | 2800                 | Clays and marls            | Marl mountains. Clays                                          | Dry crops and forest     | 23.06                              | 44.32                          | 63.57                   | 1.31                     | -0.04                                  | 0.90                    |

**Table S2.** Macroinvertebrate taxa presence-absence in the studied sampling points.

[illegible]

|                    |                 |   |   |   |   |   |   |   |   |   |   |
|--------------------|-----------------|---|---|---|---|---|---|---|---|---|---|
|                    | Culicidae       |   |   |   |   |   |   |   | X |   |   |
| <b>DECAPODA</b>    |                 |   |   |   |   |   |   |   |   |   |   |
|                    | Astacidae       | X |   |   |   |   |   |   |   |   |   |
| <b>ODONATA</b>     |                 |   |   |   |   |   |   |   |   |   |   |
|                    | Lestidae        |   |   | X |   |   |   |   | X |   |   |
|                    | Calopterygidae  | X | X | X |   |   |   | X |   | X |   |
|                    | Gomphidae       | X | X | X | X | X | X | X | X | X | X |
|                    | Aeshnidae       | X | X | X |   | X |   |   | X | X |   |
|                    | Libellulidae    |   |   |   |   |   |   |   |   |   | X |
|                    | Corduliidae     |   |   |   |   |   |   |   |   |   | X |
|                    | Platycnemididae |   |   |   |   |   | X | X |   |   |   |
| <b>GASTROPODA</b>  |                 |   |   |   |   |   |   |   |   |   |   |
|                    | Viviparidae     |   |   | X |   |   |   |   |   |   |   |
|                    | Ancylidae       | X | X | X |   | X |   | X |   | X |   |
|                    | Valvatidae      | X | X |   |   |   |   |   |   |   |   |
|                    | Hydrobiidae     |   |   |   |   |   |   | X |   |   |   |
|                    | Lymnaeidae      | X |   | X |   |   | X |   |   | X |   |
|                    | Physidae        |   |   |   | X | X | X |   | X |   |   |
|                    | Planorbidae     |   | X | X |   |   |   | X |   | X | X |
|                    | Bithyniidae     |   |   |   |   |   |   | X |   |   |   |
|                    | Bythinellidae   |   | X |   |   |   |   |   |   |   |   |
| <b>BIVALVIA</b>    |                 |   |   |   |   |   |   |   |   |   |   |
|                    | Unionidae       |   |   |   |   |   |   | X |   |   |   |
|                    | Sphaeridae      | X |   |   |   |   |   |   |   |   |   |
| <b>DECAPODA</b>    |                 |   |   |   |   |   |   |   |   |   |   |
|                    | Atyidae         |   | X | X |   |   | X | X | X |   | X |
| <b>COLEOPTERA</b>  |                 |   |   |   |   |   |   |   |   |   |   |
|                    | Dryopidae       |   | X |   |   |   |   |   |   |   |   |
|                    | Elmidae         | X | X | X | X | X | X | X | X | X | X |
|                    | Hydraenidae     | X | X | X |   | X | X | X | X | X | X |
|                    | Haliplidae      | X |   |   |   |   |   |   |   | X | X |
|                    | Hydrophilidae   | X | X |   | X | X | X | X | X | X | X |
|                    | Hygrobiidae     |   |   |   | X |   |   |   | X |   |   |
|                    | Dytiscidae      | X |   | X | X | X |   |   | X | X |   |
|                    | Gyrinidae       |   | X |   |   | X | X |   |   |   |   |
| <b>TRICLADIDA</b>  |                 |   |   |   |   |   |   |   |   |   |   |
| Dugessiidae        |                 |   | X | X |   | X | X | X | X | X | X |
| <b>MEGALOPTERA</b> |                 |   |   |   |   |   |   |   |   |   |   |
| Sialidae           |                 |   |   |   |   |   |   |   |   | X |   |
| <b>ACARIFORMES</b> |                 |   |   |   |   |   |   |   |   |   |   |
| Hidracarina        | X               | X | X | X | X | X | X | X | X | X | X |
| <b>HETEROPTERA</b> |                 |   |   |   |   |   |   |   |   |   |   |
| Mesoveliidae       |                 | X |   |   |   | X |   |   |   |   |   |

[illegible]

**Table S3.** Results of spatial autocorrelation analysis (Moran's index)

| <b>Factor</b>          | <b>Moran's index</b> | <b>P value</b>  | <b>Pattern</b> |
|------------------------|----------------------|-----------------|----------------|
| Siliceous lithology    | 0,357456             | P<0.05          | Clustered      |
| LUw (urban)            | -0,089817            | not significant | Random         |
| LUw (irrigated crop)   | -0,109996            | not significant | Random         |
| LUw (dry crop)         | 0,607352             | P<0.05          | Clustered      |
| Watershed gradient     | 0,180391             | not significant | Random         |
| Valley depth           | 0,210390             | not significant | Random         |
| Curvature              | 0,285544             | P<0.1           | Clustered      |
| Channel gradient       | -0,165519            | not significant | Random         |
| HASmed                 | -0,117732            | not significant | Random         |
| QBRmed                 | -0,295782            | not significant | Random         |
| Elevation              | 0,432352             | P<0.05          | Clustered      |
| LU100 (irrigated crop) | 0,11091              | not significant | Random         |
| LU30 (irrigated crop)  | 0,029605             | not significant | Random         |
| LU100 (forest land)    | 0,153517             | P<0.1           | Clustered      |
| HASs                   | -0,035989            | not significant | Random         |
| Temperature            | -0,252965            | P<0.1           | Dispersed      |
| pH                     | 0,037933             | not significant | Random         |
| Alkalinity             | 0,448870             | P<0.01          | Clustered      |
| IBMPW                  | 0,590503             | P<0.01          | Clustered      |
| EPT                    | 0,47695              | P<0.01          | Clustered      |

**Table S4.** RDA statistically significant results

| Season                 | Level     | Factor               | Df     | AIC    | F Pr(>F) | Signif. code |
|------------------------|-----------|----------------------|--------|--------|----------|--------------|
| Spring                 | Watershed | LUW (dry crop)       | 20.587 | 1.7475 | 0.010    | **           |
|                        |           | LUW (Urban)          | 20.620 | 1.7154 | 0.015    | *            |
|                        |           | LUW (irrigated crop) | 20.692 | 1.6464 | 0.020    | *            |
|                        | Segment   | Valley depth index   | 20.266 | 2.0661 | 0.005    | **           |
|                        |           | Curvature            | 20.372 | 1.9591 | 0.005    | **           |
|                        |           | Channel gradient     | 20.707 | 1.6314 | 0.025    | *            |
|                        | Local     | HASs                 | 21     | 1.4589 | 0.050    | *            |
| Summer                 | Watershed | LUW (dry crop)       | 24.151 | 1.8116 | 0.005    | **           |
|                        |           | LUW (Urban)          | 24.465 | 1.5084 | 0.030    | *            |
|                        | Segment   | Curvature            | 24     | 1.5287 | 0.035    | *            |
|                        |           | HASmed               | 24     | 1.5366 | 0.040    | *            |
|                        | Local     | pH                   | 24     | 1.6188 | 0.010    | **           |
|                        |           | HASs                 | 24     | 1.5316 | 0.020    | *            |
|                        |           | Alkalinity           | 24     | 1.5503 | 0.045    | *            |
| Autumn                 | Watershed | LUW (dry crop)       | 22.987 | 2.088  | 0.020    | *            |
|                        |           | HASmed               | 22.896 | 2.1801 | 0.005    | **           |
|                        | Segment   | Curvature            | 23.263 | 1.8137 | 0.040    | *            |
|                        |           | QBRmed               | 23.351 | 1.7276 | 0.040    | *            |
|                        | Local     | HASs                 | 23.209 | 18.662 | 0.010    | **           |
|                        |           | pH                   | 23.168 | 19.068 | 0.015    | *            |
|                        |           | Alkalinity           | 23.527 | 15.577 | 0.035    | *            |
| LU30m (irrigated crop) |           | 23.115               | 19.601 | 0.050  | *        |              |
| Winter                 | Watershed | LUW (irrigated crop) | 20.806 | 2.1323 | 0.005    | **           |
|                        |           | LUW (dry crop)       | 20.738 | 2.2015 | 0.010    | **           |
|                        |           | LUW (Urban           | 20.826 | 2.1120 | 0.015    | *            |
|                        |           | Siliceous lithology  | 21.433 | 1.5163 | 0.030    | *            |
|                        | Segment   | --                   | --     | --     | --       | --           |
|                        | Local     | Temperature          | 21.260 | 1.6831 | 0.030    | *            |

Signif. codes: 0.001 '\*\*\*' 0.01 '\*\*'
